# Supplementary figures and images for: Tuning the intermolecular dative interactions by altering the ligand planarity and counter cations in vanadyl(iv) complexes
Source: Royal Society of Chemistry journal article supplement (doi:10.1039/b501350j), 2005-01-01

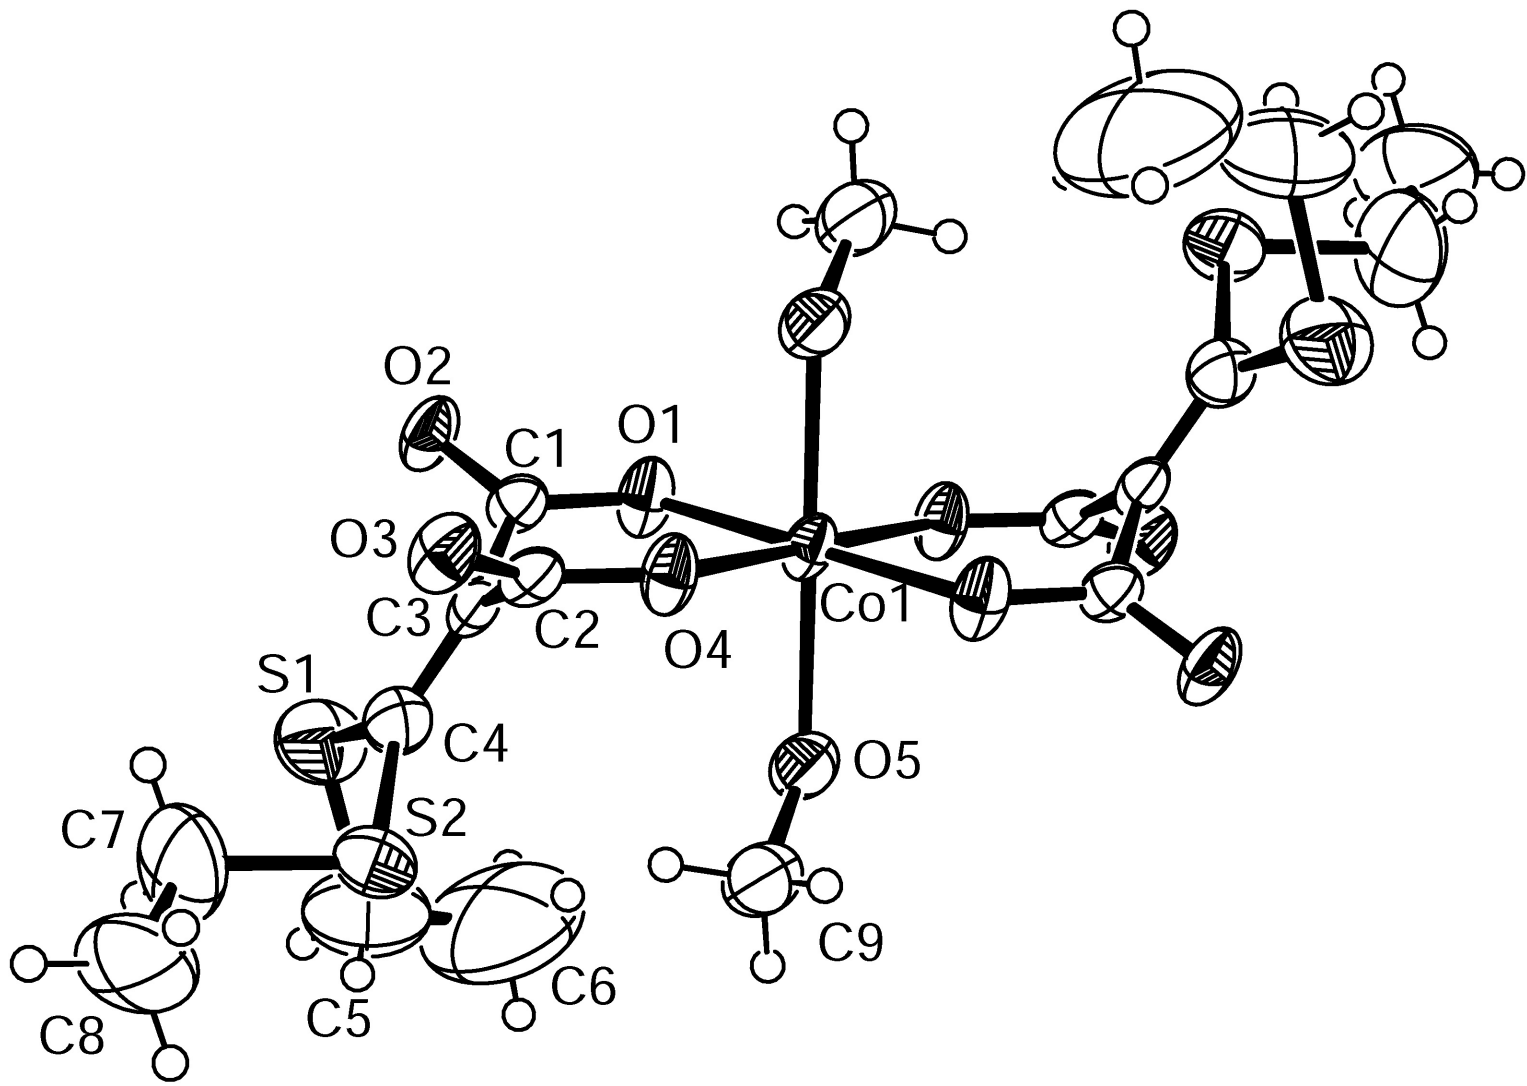

Supplement: b501350j.pdf [file b501350j.pdf]
